# Supplementary material
Source: publisher figshare collection journal article supplement (https://acs.figshare.com/ndownloader/files/3781180)
Supplement: Supplementary file 1 [file 3781180]

**Supporting Information for**  
**A Cooperative Reformable Channel System with Unique Recognition of Gas**  
**Molecules in a Zeolitic Imidazolate Framework with Multi-Level Flexible**  
**Ligands**

Benyamin Motevalli,<sup>§</sup> Huanting Wang,<sup>†</sup> and Jefferson Zhe Liu<sup>§,\*</sup>

<sup>§</sup>Department of Mechanical and Aerospace Engineering, Monash University, Clayton, Victoria  
3800, Australia

<sup>†</sup>Department of Chemical Engineering, Monash University, Clayton, Victoria 3800, Australia

**Table S1.** Summary of the permeance and separation performances of ZIF-8 and ZIF-L membranes for H<sub>2</sub>, N<sub>2</sub>, and CO<sub>2</sub> in experiments.

**Figure S1.** Crystal structures of the main cage of ZIF-L. Two methyl heads point toward the centre of the cage, leading to a significantly constrained void dimension at the centre.

**Figure S2.** Deformation of the *b*- gate of ZIF-L caused by a gas molecule (a) CO<sub>2</sub> or (b) N<sub>2</sub> at the gate centre.

**Figure S3.** Structure and charge analysis of the guest-host complex at *b*- gate. (a) Interatomic distances for CO<sub>2</sub> at the centre of *b*-gate. (b) Interatomic distances for N<sub>2</sub> at the centre of *b*-gate.

**Figure S4.** A cartoon to demonstrate the crowded and narrow channel passing through the 6-membered ring window (side view) in *c*- crystal direction of ZIF-L. A curvy diffusion path is depicted. The presence of two FLs enforces the orientation of the CO<sub>2</sub> molecule to be parallel to the 6MR plane.

**Figure S5.** A charge difference analysis when (a) CO<sub>2</sub> or (b) N<sub>2</sub> molecule passes through the 6-MR window in the channel along *c*- crystal direction.

**Table S1** A summary of the permeability and selectivity of ZIF-8 membranes for H<sub>2</sub>, N<sub>2</sub>, and CO<sub>2</sub> gases measured in experiments. The results of ZIF-L membranes from this work are shown for comparison. Overall the permeability of ZIF-8 membranes for different gases follows the sequence H<sub>2</sub> > CO<sub>2</sub> > N<sub>2</sub>. This is consistent with the kinetic diameter of the gas molecules, H<sub>2</sub> (2.9 Å), CO<sub>2</sub> (3.3 Å), and N<sub>2</sub> (3.64 Å). Considering that ZIF-8 does not have a continuous channel system, the molecular gating mechanism is a plausible explanation for the experimental observation. Interestingly, our ZIF-L membrane has a much better permeability for N<sub>2</sub> than CO<sub>2</sub>, despite that N<sub>2</sub> has a larger kinetic diameter than CO<sub>2</sub>. The ideal selectivity of ZIF-8 and ZIF-L membranes was calculated and is shown in Table S1. We also carried out gas separation experiments for gas mixture to determine the selectivity for H<sub>2</sub>/CO<sub>2</sub> and H<sub>2</sub>/N<sub>2</sub>.

**Table S1.** Summary of H<sub>2</sub>, N<sub>2</sub>, and CO<sub>2</sub> permeance and separation performance of ZIF-8 and ZIF-L membranes in experiments.

| Membranes | H <sub>2</sub> /N <sub>2</sub> | H <sub>2</sub> /CO <sub>2</sub> | CO <sub>2</sub> /N <sub>2</sub> | Permeability (10 <sup>-2</sup> mol·m <sup>-3</sup> ·s <sup>-1</sup> ·Pa <sup>-1</sup> ) |                |                 | Thickness<br>(μm) | Condition                         | Ref* |
|-----------|--------------------------------|---------------------------------|---------------------------------|-----------------------------------------------------------------------------------------|----------------|-----------------|-------------------|-----------------------------------|------|
|           |                                |                                 |                                 | H <sub>2</sub>                                                                          | N <sub>2</sub> | CO <sub>2</sub> |                   |                                   |      |
| ZIF-8     | 11.5                           | 4.5                             | 2.6                             | 0.020                                                                                   | 0.002          | 0.004           | 30                | Ideal                             | 1    |
| ZIF-8     | 12.0                           | 5.2                             | 2.3                             | 0.096                                                                                   | 0.008          | 0.018           | 25                | Ideal                             | 2    |
| ZIF-8     | 4.0                            | 2.8                             | 1.4                             | 1.440                                                                                   | 0.360          | 0.520           | 2.5               | Ideal                             | 3    |
| ZIF-8     | 7.3                            | 5.2                             | 1.4                             | 2.200                                                                                   | 0.302          | 0.424           | 5                 | Ideal                             | 4    |
| ZIF-8     | 11.0                           | 3.9                             | 2.9                             | 7.700                                                                                   | 0.700          | 2.000           | 2                 | Ideal                             | 5    |
| ZIF-8     | 10.0                           | 4.6                             | 2.2                             | 0.190                                                                                   | 0.019          | 0.041           | 1                 | Ideal                             | 6    |
| ZIF-8     | 12.3                           | 3.5                             | 3.5                             | 0.358                                                                                   | 0.029          | 0.102           | 12                | Ideal                             | 7    |
| ZIF-8     | 11.7                           | 3.7                             | 3.1                             | 0.088                                                                                   | 0.008          | 0.024           | 20                | Ideal                             | 8    |
| ZIF-8     | 9.2                            | 5.4                             | 1.7                             | 0.730                                                                                   | 0.079          | 0.135           | 10                | Ideal                             | 9    |
| ZIF-8     | 10.4                           | 4.1                             | 2.6                             | 0.260                                                                                   | 0.025          | 0.064           | 8                 | Ideal                             | 10   |
| ZIF-L     | 3.9                            | 5.5                             | 0.70                            | 4.200                                                                                   | 1.080          | 0.760           | 10                | Ideal; b-oriented                 | 11   |
| ZIF-L     | 5.7                            | 10.4                            | 0.54                            | 16.920                                                                                  | 2.980          | 1.620           | 5                 | Ideal; c-oriented                 | 11   |
| ZIF-L     | 3.8                            | 5.3                             | 0.73                            | 1.690                                                                                   | 0.440          | 0.320           | 10                | Ideal; b-oriented; PFA treatment  | 11   |
| ZIF-L     | 8.1                            | 24.3                            | 0.33                            | 3.900                                                                                   | 0.480          | 0.160           | 5                 | Ideal; c-oriented; PFA treatment  | 11   |
| ZIF-L     | 3.8                            | 4.9                             |                                 |                                                                                         |                |                 |                   | Binary; b-oriented; PFA treatment | 11   |
| ZIF-L     | 7.7                            | 15.2                            |                                 |                                                                                         |                |                 |                   | Binary; c-oriented; PFA treatment | 11   |

\* Reference 1 to 10 correspond to reference 22 to 31 in main text. Reference 11 corresponds to reference 21 in main text.

Figure S1 shows the zoom-in view of crystal structures of the main cage. The blue iso-surface shows the size and shape of the main cage. As seen, there are two methyl heads (dashed box) pointing to the centre of the cage, hence narrowing the cage at this cross-section. As a result, a small peak is observed in the energy profiles of N<sub>2</sub> and CO<sub>2</sub> at the centre, indicating that these gases experience a repulsive interaction from the methyl heads. This helps understand why the most favourable adsorption site of CO<sub>2</sub> or N<sub>2</sub> is not in the exact centre of the main cage of ZIF-L (Figure 2).

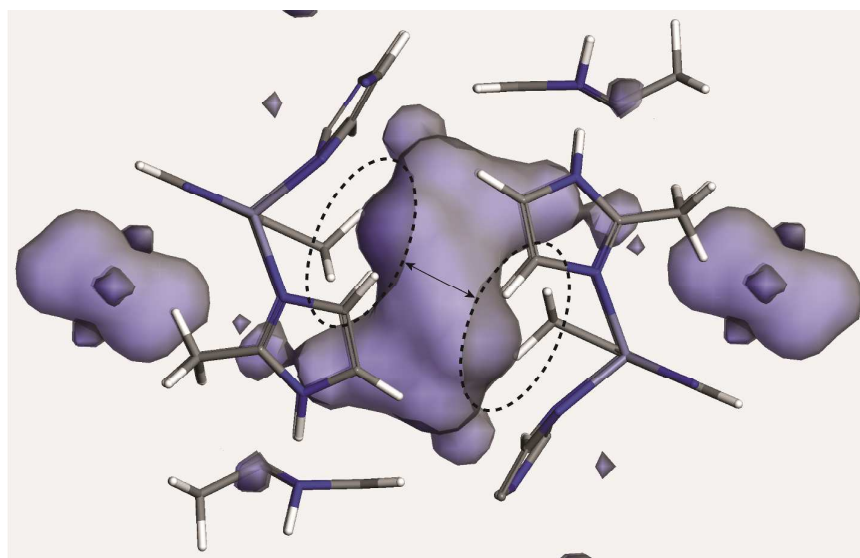

**Figure S1.** Crystal structures of the main cage of ZIF-L. Two methyl heads point toward the centre of the cage, leading to a significantly constrained void dimension at the centre.

ZIF-L does not have a continuous channel system (Figure 2). Those molecular gates that block the channels must be opened to allow the passage of gas molecules. The traditional view of such a molecular gating effect believes the ‘size’ of the gas molecules play a decisive role in determining the channel deformation (or gating opening) and thus dictate the permeance of the membranes for different gases. It is generally accepted that CO<sub>2</sub> has a smaller cross-sectional diameter than N<sub>2</sub>, *i.e.*, 3.3 vs. 3.64 Å. Thus it is reasonable that CO<sub>2</sub> deforms the gates/channels less significantly than N<sub>2</sub>. DFT calculations were carried out to confirm this expectation in our ZIF-L crystal. Figure S2 (a) and (b) show the deformation of *b*-gate in ZIF-L. Indeed, N<sub>2</sub> has led to a more

significant deformation. Consequently,  $\text{N}_2$  should have a higher energy barrier for its transport in ZIF-L, and thus a lower permeability. But this is in contrast to the experimental results. We can conclude that the gate opening mechanism cannot explain the interesting permeability of ZIF-L membranes.

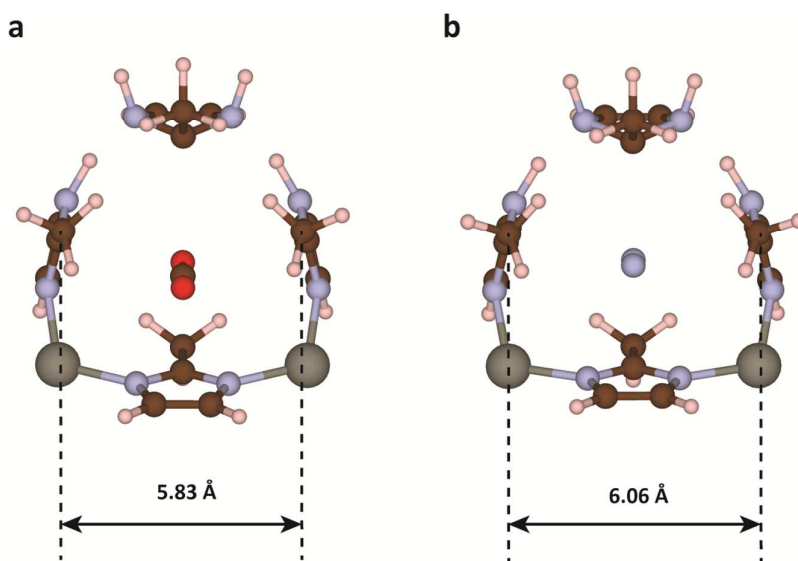

**Figure S2.** Deformation of the *b*-gate of ZIF-L caused by a gas molecule (a)  $\text{CO}_2$  or (b)  $\text{N}_2$  at the gate centre.

To understand why the  $\text{N}_2$  has a less positive binding energy (i.e., less ‘repulsive’ interaction) at the *b*-gate centre despite it deforms the gate more significant than  $\text{CO}_2$  molecule, we examined the chemical interactions between the gas molecules and gating molecules (one CL, two TLs, and one FL). The charge difference analyses and Bader analysis shown in Figure 4(a)-(d) indicate stronger charge redistribution for the case of  $\text{N}_2$ . For the case of  $\text{CO}_2$ , it can be noticed that the atomic charge changes mainly occurs on  $\text{O}_1$  atom (on  $\text{CO}_2$  molecule), the connecting ligand ( $\text{C}_3$  and  $\text{C}_4$ ), and the hydrogen atoms of the two methyl-heads. Overall the  $\text{N}_2$  case has a more significant atomic charge change. It mainly happens on the  $\text{N}_2$  molecule, the FL ligand, and the CL. Another evidence to demonstrate the stronger interaction of  $\text{N}_2$  to the *b*-gate is the interatomic distance. The shortest distance between  $\text{N}_2$  and the FL is only about 2.54 Å, much shorter than that of  $\text{CO}_2$ , 3.04 Å as seen in Fig. S3.

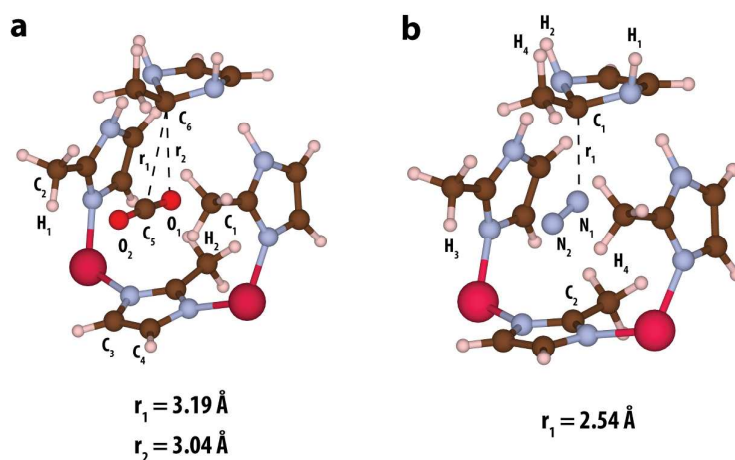

**Figure S3.** Structure and charge analysis of the guest-host complex at *b*- gate. (a) the Bader analysis and (b) Interatomic distances for CO<sub>2</sub> at the centre of *b*-gate. (c) The Bader analysis and (d) interatomic distance for N<sub>2</sub> at the centre of *b*-gate.

Figure S4 depicts the diffusion path of a CO<sub>2</sub> molecule through the 6MR window along the *c*- channel. It is seen that the 6MR gateway (side view) is blocked from both sides by the two FLs. Some critical interatomic distances are shown. For example, the two FLs are distanced about 2.78 Å, making this cross-section too compact. Such a compact configuration enforces the gas molecule to re-orient when passing through the 6MR gate, so that the longer dimension of the gas molecule would be parallel to the 6MR plane. Hence, instead of the kinetic cross-section diameter, the longer dimension of the gas molecules plays the major rule in selective recognition.

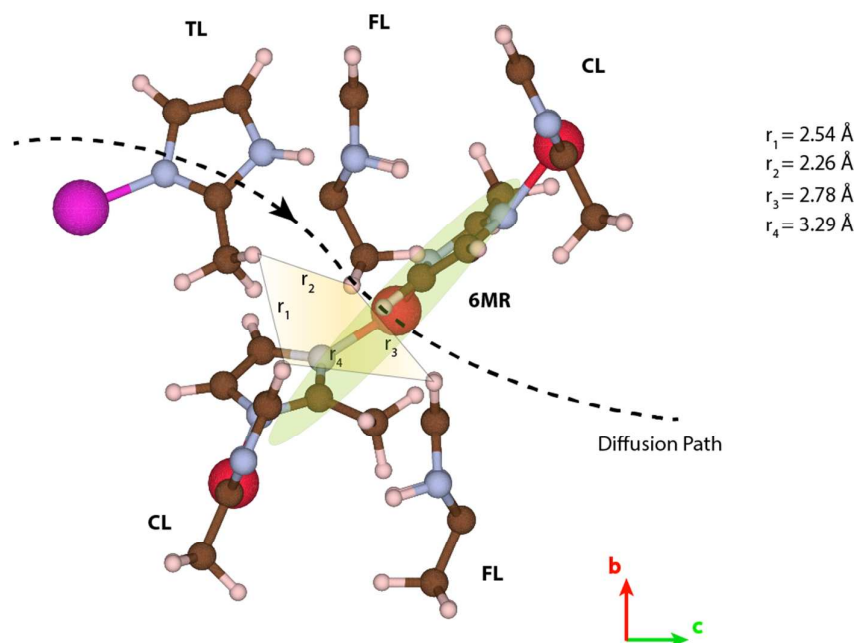

**Figure S4.** A cartoon to demonstrate the crowded and narrow channel passing through the 6-membered ring window (side view) in *c*- crystal direction of ZIF-L. A curvy diffusion path is depicted. The presence of two FLs enforces the orientation of the CO<sub>2</sub> molecule to be parallel to the 6MR plane.

Figure S5 shows the charge difference analysis for the guest-host complex when CO<sub>2</sub> or N<sub>2</sub> is passing through the 6MR gateway. This configuration corresponds to the saddle point of the binding profile along the *c*- channel (Figure 2), where the gases experience the highest (positive) binding energy. Note that the gas molecules adaptively re-orient themselves to fit-in the flexible channel that has been deformed under the influence of the gas molecules. The charge difference analysis shows the charge re-distribution for these two cases are comparable, suggesting that the chemical interaction may not be the reason for the less positive binding energy of N<sub>2</sub> at the saddle point, which is in contrast with the case of *b*- gate.

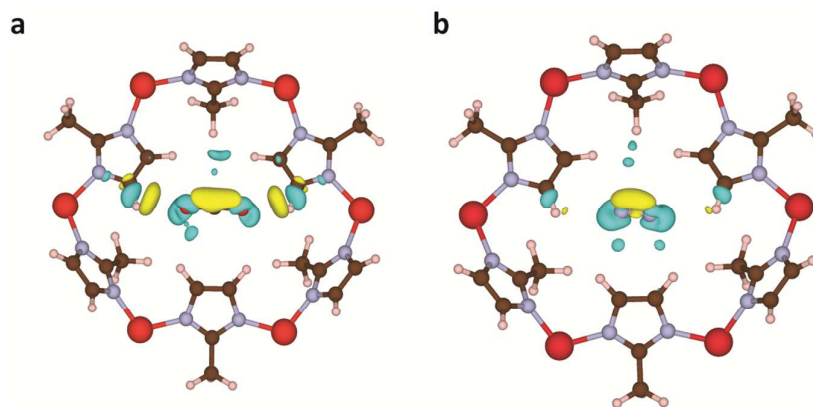

**Figure S5.** A charge difference analysis when (a) CO<sub>2</sub> or (b) N<sub>2</sub> molecule passes through the 6-MR window in the channel along *c*- crystal direction.

## References

- (1) Bux, H.; Liang, F. Y.; Li, Y. S.; Cravillon, J.; Wiebcke, M.; Caro, J. Zeolitic Imidazolate Framework Membrane with Molecular Sieving Properties by Microwave-Assisted Solvothermal Synthesis. *J. Am. Chem. Soc.* 2009, 131, 16000-16001.
- (2) Shah, M.; Kwon, H. T.; Tran, V.; Sachdeva, S.; Jeong, H. K. One Step in situ Synthesis of Supported Zeolitic Imidazolate Framework ZIF-8 Membranes: Role of Sodium Formate. *Microporous Mesoporous Mat.* 2013, 165, 63-69.
- (3) Pan, Y. C.; Lai, Z. P. Sharp Separation of C2/C3 Hydrocarbon Mixtures by Zeolitic Imidazolate Framework-8 (ZIF-8) Membranes Synthesized in Aqueous Solutions. *Chem. Commun.* 2011, 47, 10275-10277.
- (4) Tao, K.; Kong, C. L.; Chen, L. High Performance ZIF-8 Molecular Sieve Membrane on Hollow Ceramic Fiber via Crystallizing-Rubbing Seed Deposition. *Chem. Eng. J.* 2013, 220, 1-5.
- (5) Pan, Y. C.; Wang, B.; Lai, Z. P. Synthesis of Ceramic Hollow Fiber Supported Zeolitic Imidazolate Framework-8 (ZIF-8) Membranes with High Hydrogen Permeability. *J. Membr. Sci.* 2012, 421, 292-298.
- (6) Shekhah, O.; Swaidan, R.; Belmabkhout, Y.; du Plessis, M.; Jacobs, T.; Barbour, L. J.; Pinnau, I.; Eddaoudi, M. The Liquid Phase Epitaxy Approach for the Successful Construction of Ultra-Thin and Defect-Free ZIF-8 Membranes: Pure and Mixed Gas Transport Study. *Chem. Commun.* 2014, 50, 2089-2092.
- (7) Huang, K.; Dong, Z. Y.; Li, Q. Q.; Jin, W. Q. Growth of a ZIF-8 Membrane on the Inner-Surface of a Ceramic Hollow Fiber via Cycling Precursors. *Chem. Commun.* 2013, 49, 10326-10328.
- (8) McCarthy, M. C.; Varela-Guerrero, V.; Barnett, G. V.; Jeong, H. K. Synthesis of Zeolitic Imidazolate Framework Films and Membranes with Controlled Microstructures. *Langmuir* 2010, 26, 14636-14641.
- (9) Tao, K.; Cao, L. J.; Lin, Y. C.; Kong, C. L.; Chen, L. A Hollow Ceramic Fiber Supported ZIF-8 Membrane with Enhanced Gas Separation Performance Prepared by Hot Dip-Coating Seeding. *J. Mater. Chem. A*, 2013, 1, 13046-13049.



- (10) Zhang, X. F.; Liu, Y. G.; Kong, L. Y.; Liu, H. O.; Qiu, J. S.; Han, W.; Weng, L. T.; Yeung, K. L.; Zhu, W. D. A Simple and Scalable Method for Preparing Low-Defect ZIF-8 Tubular Membranes. *J. Mater. Chem. A* 2013, 1, 10635-10638.
- (11) Zhong, Z.; Yao, J.; Chen, R.; Low, Z.; He, M.; Liu, J.Z.; Wang, H., Oriented Two-dimensional Zeolitic Imidazolate Framework-L Membranes and their Gas Permeation Properties. *J. Mat. Chem. A* (DOI: 10.1039/C5TA03707G, in press)
